# Supplementary material for: Time-resolved FTIR study of light-driven sodium pump rhodopsins
Source: Royal Society of Chemistry journal article supplement (doi:10.1039/c8cp02599a), 2018-01-01
Supplement: c8cp02599a1.pdf [file c8cp02599a1.pdf]

## **Time-Resolved FTIR Study of Light-Driven Sodium Pump Rhodopsins**

*Hui-Fen Chen,<sup>1, 2</sup> Keiichi Inoue,<sup>2, 3, 4</sup> Hikaru Ono,<sup>2</sup> Rei Abe-Yoshizumi,<sup>2</sup> Akimori Wada,<sup>5</sup>  
and Hideki Kandori<sup>2, 3 \*</sup>*

<sup>1</sup>Department of Medicinal and Applied Chemistry, Kaohsiung Medical University,  
Address: 100, Shih-Chuan 1st Road, Kaohsiung, Taiwan,

<sup>2</sup>Department of Life Science and Applied Chemistry, Nagoya Institute of Technology, Showa-  
ku, Nagoya 466-8555, Japan,

<sup>3</sup>OptoBioTechnology Research Center, Nagoya Institute of Technology, Showa-ku, Nagoya  
466-8555, Japan,

<sup>4</sup>PRESTO, Japan Science and Technology Agency, 4-1-8 Honcho Kawaguchi, Saitama 332-  
0012, Japan,

<sup>5</sup>Laboratory of Organic Chemistry for Life Science, Kobe Pharmaceutical University, Kobe  
658-8558, Japan

\* Correspondence authors E-mail: kandori@nitech.ac.jp

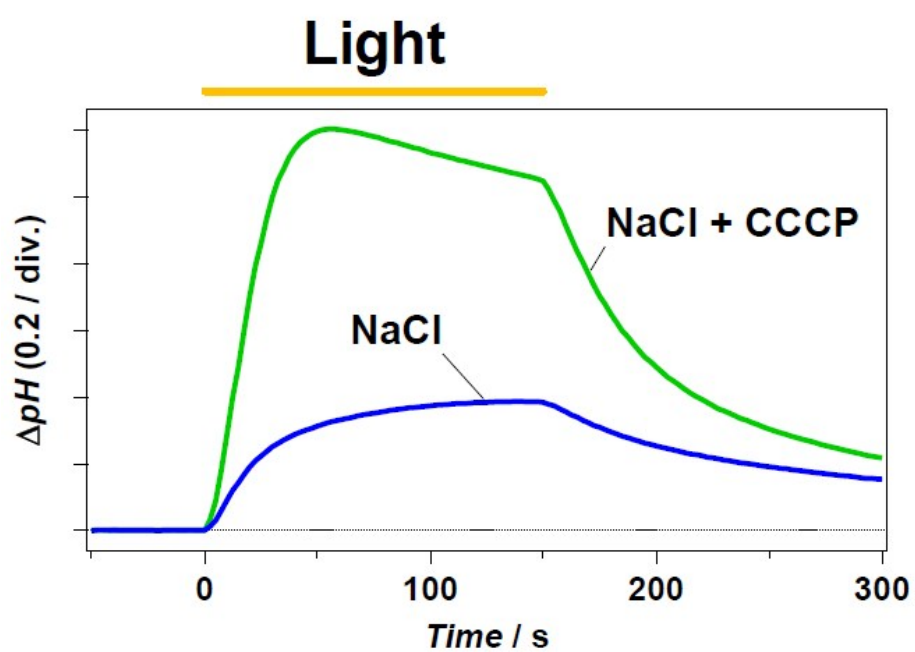

**Figure S1.** Sodium-pump activity of NdR2.

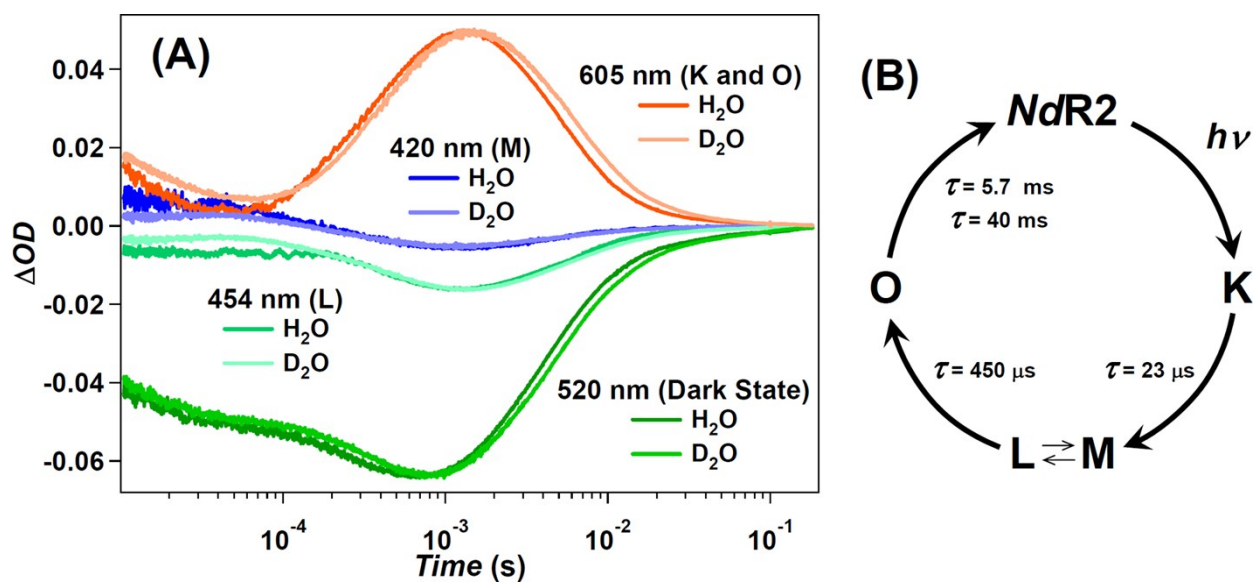

**Figure S2.** Flash photolysis data of NdR2. (A) Time traces of absorption changes of NdR2 at 420 (blue), 454 (light green), 520 (green) and 605 nm (orange) probe wavelengths. The samples were hydrated with  $H_2O$ . (B) Photocycle of NdR2.

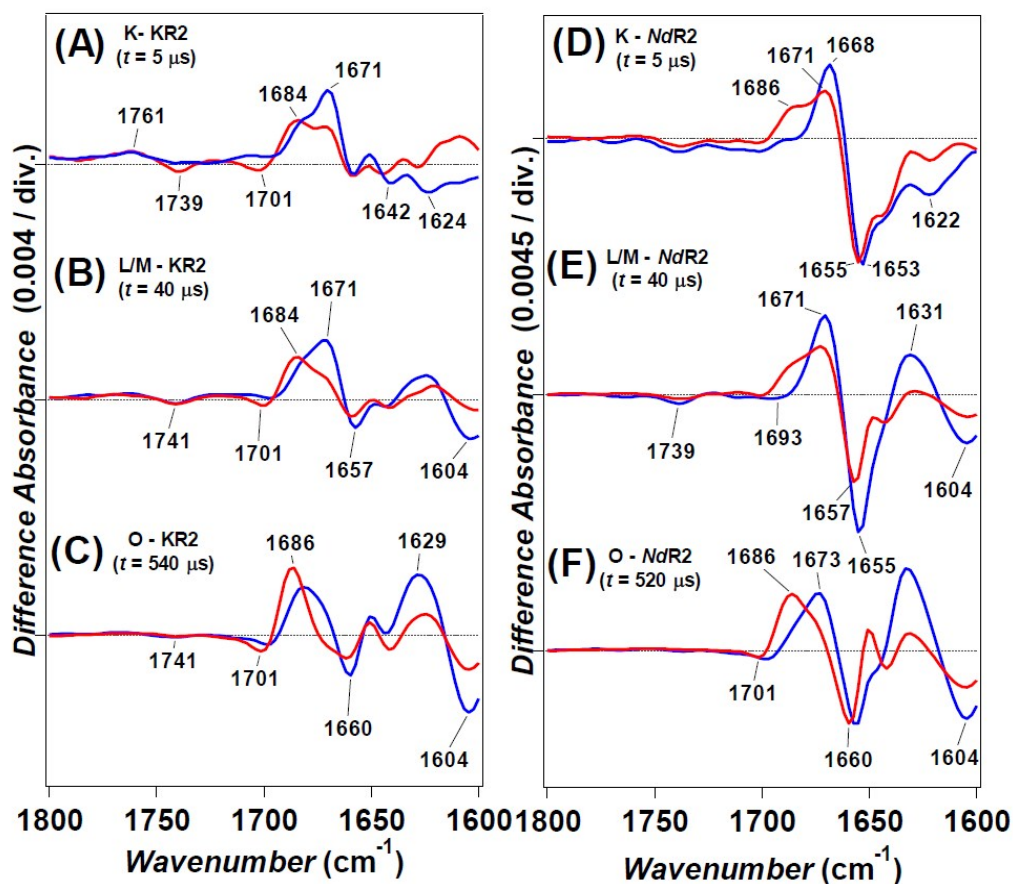

**Figure S3.** Time-resolved difference spectra for KR2 (A-C) and NdR2 (D-F) at 1800-1600  $\text{cm}^{-1}$ . The spectra are obtained at 5  $\mu\text{s}$  (A, D), 40  $\mu\text{s}$  (B, E), 540  $\mu\text{s}$  (C), and 520  $\mu\text{s}$  (F), which mainly monitor the K intermediate of KR2 and NdR2, the L/M intermediate of KR2 and NdR2, the O intermediate of KR2, and the O intermediate of NdR2, respectively. The sample was hydrated with  $\text{H}_2\text{O}$  (red lines) or  $\text{H}_2\text{O}$  (blue lines).

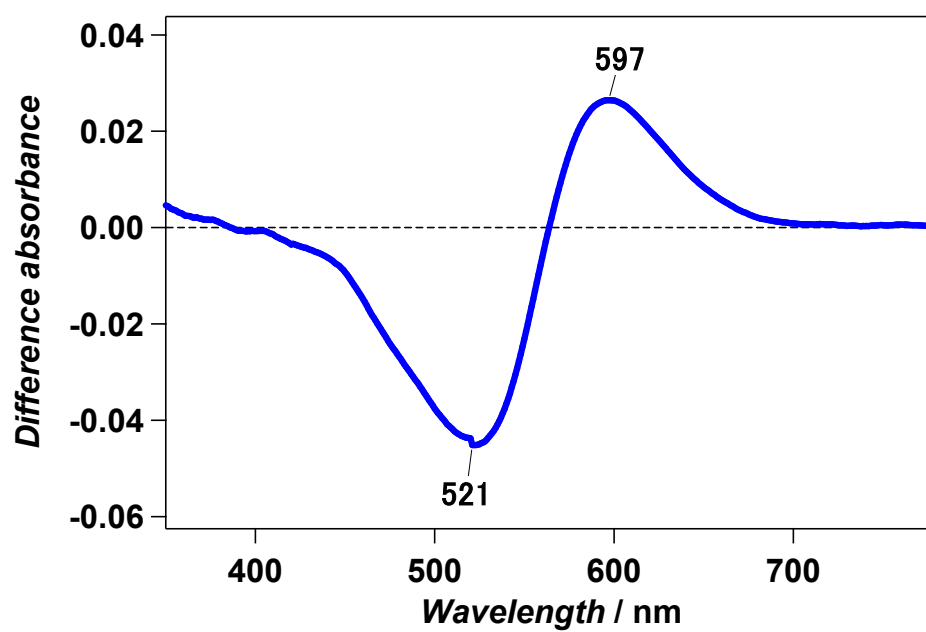

**Figure S4.** Low-temperature light-induced UV-visible absorption spectrum of KR2 upon illumination at  $\lambda > 500$  nm at 240 K.

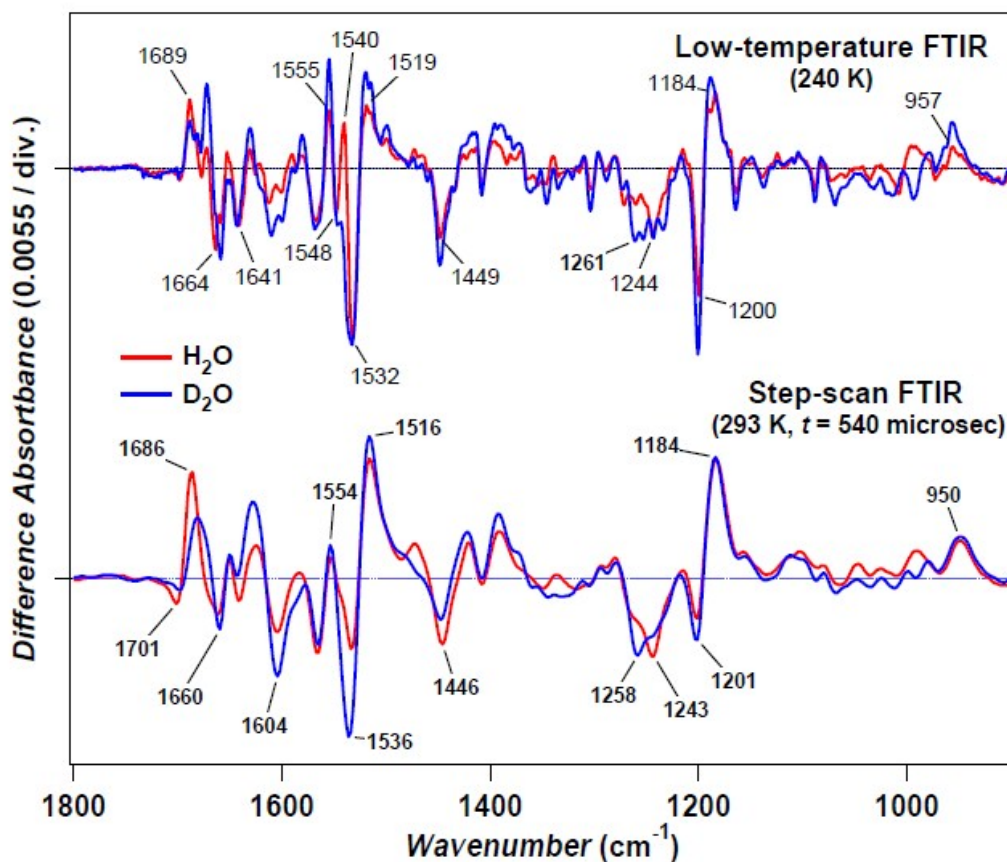

**Figure S5.** Comparison of the O-minus-KR2 spectra between low (upper trace) and room (lower trace) temperatures. The upper spectra are obtained by stationary measurements at 240 K, where the sample is illuminated at 500 nm, while the lower spectra are obtained at 540  $\mu$ s after laser excitation at 532 nm in the step-scan time-resolved measurements. The sample was hydrated with H<sub>2</sub>O (red lines) or D<sub>2</sub>O (blue lines).
